# Supplementary material for: The Insecticidal Efficacy and Physiological Action Mechanism of a Novel Agent GC16 against Tetranychus pueraricola (Acari: Tetranychidae)
Source: MDPI journal article supplement (doi:10.3390/insects13050433), 2022-05-05
Supplement: s1 [file s1]

**Table S1.** The raw data of bioassays of GC16 on mites

| Stage | Concentration (g/L) | All <sup>a</sup> | 24 h-D <sup>b</sup> | 24 h-L <sup>c</sup> |
|-------|---------------------|------------------|---------------------|---------------------|
| egg   | 0                   | 92               | 4                   | 88                  |
|       | 1.25                | 80               | 32                  | 48                  |
|       | 5                   | 84               | 56                  | 28                  |
|       | 10                  | 99               | 82                  | 17                  |
|       | 20                  | 70               | 59                  | 11                  |
| larva | 0                   | 165              | 14                  | 151                 |
|       | 0.83                | 143              | 31                  | 112                 |
|       | 1.67                | 213              | 113                 | 100                 |
|       | 3.33                | 91               | 56                  | 35                  |
|       | 6.67                | 97               | 90                  | 7                   |
| nymph | 13.33               | 176              | 176                 | 0                   |
|       | 0                   | 93               | 6                   | 87                  |
|       | 0.83                | 108              | 53                  | 55                  |
|       | 1.67                | 189              | 109                 | 80                  |
|       | 3.33                | 110              | 81                  | 29                  |
| adult | 6.67                | 98               | 93                  | 5                   |
|       | 13.33               | 88               | 88                  | 0                   |
|       | 0                   | 109              | 6                   | 103                 |
|       | 0.83                | 118              | 34                  | 84                  |
|       | 1.67                | 118              | 50                  | 68                  |
|       | 3.33                | 109              | 79                  | 30                  |
|       | 6.67                | 92               | 75                  | 17                  |
|       | 13.33               | 79               | 79                  | 0                   |

Note: a, Number of all tested mites. b, Number of all died mites in 24 h after GC16 treatment. c, Number of all live mites in 24 h after GC16 treatment.

**Table S2.** The egg hatchability and developmental duration of *T. pueraricola* under GC16 treatment

| Treatment                       | Hatching rate (%)                                 | Mean $\pm$ SE (%)  | Duration (day)                                    | Mean $\pm$ SE (day) |
|---------------------------------|---------------------------------------------------|--------------------|---------------------------------------------------|---------------------|
| Control                         | 87.50                                             | 94.38 $\pm$ 3.66 a | 4.380                                             | 4.070 $\pm$ 0.160 b |
| Control                         | 100.00                                            |                    | 3.875                                             |                     |
| Control                         | 95.65                                             |                    | 3.950                                             |                     |
| GC16                            | 15.56                                             | 14.30 $\pm$ 0.73 b | 5.000                                             | 5.100 $\pm$ 0.097 a |
| GC16                            | 14.29                                             |                    | 5.000                                             |                     |
| GC16                            | 13.04                                             |                    | 5.290                                             |                     |
| <i>t</i> , <i>df</i> , <i>P</i> | <i>t</i> = 4.576, <i>df</i> = 4, <i>p</i> < 0.001 |                    | <i>t</i> = 1.480, <i>df</i> = 4, <i>p</i> = 0.005 |                     |

Note: The concentration of GC16 was 10 g/L. Independent sample *t* test was used for one way ANOVA, and different lowercase letters in the same column indicated significant difference between treatments (*p* < 0.05).
